# Supplementary material
Source: Springer Nature journal article supplement (https://www.springermedizin.de/resource/supplementary/12913_2011_1928_MOESM6_ESM.pdf/9529668)
Supplement: MOESM6 [file 9529668]

81,745 admissions with hip fracture (2002-2005)

Criteria for patient exclusion: 6,889 (8.4%)  
< 60 years old  
Multiple or pathological fractures  
Non urgent admission  
Length of stay > 30 days

74,856 admissions

Criteria for hospital exclusion: 10,247 (12.5%)

- 79 From 19 hospitals with <30 hip fractures
- 408 From 3 hospitals without mortality data
- 9,760 From 16 hospitals without >10% missing data in surgery dates.

64,609 admissions

Other exclusion criteria: 8,109 (9.9%)

- 7,273 No surgery
- 836 No surgery date

56,500 admissions

Early surgery  
13,998 (24.8%)

Delayed surgery  
42,502 (75.2%)

539 (3.8%)

1,878 (4.4%)

Inhospital mortality
